# Supplementary material for: Intermittent Use of Portable NIV Increases Exercise Tolerance in COPD: A Randomised, Cross-Over Trial
Source: MDPI journal article supplement (doi:10.3390/jcm8010094), 2019-01-15
Supplement: s1 [file s1]

**Table S1.** Effects of the use of pNIV on anxiety, symptom burden & ability to perform tasks.

| Question                                                                                                                 | Pre-VitaBreath                                                          | Post-VitaBreath                                                       | p value                                            |
|--------------------------------------------------------------------------------------------------------------------------|-------------------------------------------------------------------------|-----------------------------------------------------------------------|----------------------------------------------------|
| How anxious are you about becoming short of breath (SOB)?<br>1= Not at all anxious<br>10 = Very anxious                  | 7.50 (5.25-8.75)                                                        | 4 (2-5.75)                                                            | 0.001*<br><br>20 improvements<br>2 worse<br>2 ties |
| How long did it take you to recover from SOB?<br><1 min<br>2-3 min<br>4-5 min<br>5-7 min<br>7-10 min<br>More than 10 min | 0 (0%)<br>7 (29.2%)<br>3 (12.5%)<br>5 (20.8%)<br>5 (20.8%)<br>4 (16.7%) | 6 (25%)<br>9 (37.5%)<br>4 (16.7%)<br>1 (4.2%)<br>2 (8.3%)<br>2 (8.3%) | 0.002*<br><br>17 improvements<br>3 worse<br>4 ties |
| Question                                                                                                                 | Two weeks of VitaBreath                                                 | Twelve weeks of VitaBreath                                            |                                                    |
| Has VitaBreath helped your ability to perform activities?                                                                |                                                                         |                                                                       |                                                    |
| Speed^<br>1 Not at all<br>2<br>3<br>4<br>5 Yes, Definitely                                                               | 10 (45.5%)<br>1 (4.5%)<br>3 (13.6%)<br>6 (27.3%)<br>2 (9.1%)            | 8 (33.3%)<br>1 (4.2%)<br>6 (25%)<br>2 (8.3%)<br>7 (29.2%)             | 0.410*<br><br>6 improvements<br>4 worse<br>12 ties |
| Duration^<br>1 Not at all<br>2<br>3<br>4<br>5 Yes, Definitely                                                            | 8 (36.4%)<br>1 (4.5%)<br>3 (13.6%)<br>6 (27.3%)<br>4 (18.2%)            | 6 (25%)<br>3 (12.5%)<br>5 (20.8%)<br>3 (12.5%)<br>7 (29.2%)           | 0.856*<br><br>7 improvements<br>6 worse<br>9 ties  |
| Confidence§<br>1 Not at all<br>2<br>3<br>4<br>5 Yes, Definitely                                                          | 2 (8.7%)<br>2 (8.7%)<br>7 (30.4%)<br>6 (26.1%)<br>6 (26.1%)             | 4 (16.7%)<br>1 (4.2%)<br>5 (20.8%)<br>5 (20.8%)<br>9 (37.5%)          | 0.972*<br><br>8 improvements<br>5 worse<br>10 ties |
| How often do you use VitaBreath?<br><br>Several Times a day<br>Once a day<br>Couple times a week<br>Once a week          | <br><br>17 (70.8%)<br>1 (4.2%)<br>3 (12.5%)<br>2 (8.3%)                 | <br><br>15 (62.5%)<br>1 (4.2%)<br>5 (20.8%)<br>2 (8.3%)               | <br><br>0.588*                                     |

|                                                                          |            |            |                |
|--------------------------------------------------------------------------|------------|------------|----------------|
| Not at all                                                               | 1 (4.2%)   | 1 (4.2%)   |                |
| What do you use VitaBreath for?~                                         |            |            |                |
| Waking Inside                                                            | 15 (62.5%) | 15 (65.2%) | n/a            |
| Walking Outside                                                          | 13 (54.2%) | 15 (65.2%) | n/a            |
| Climbing Stairs                                                          | 5 (20.8%)  | 8 (34.8%)  | n/a            |
| Grocery shopping                                                         | 2 (8.3%)   | 7 (30.4%)  | n/a            |
| Playing with family                                                      | 2 (8.3%)   | 4 (17.4%)  | n/a            |
| Other physical activity                                                  | 5 (20.8%)  | 7 (30.4%)  | n/a            |
| Indoor activities                                                        | 15 (62.5%) | 17 (73.9%) | 0.453**        |
| Outdoor activities                                                       | 15 (62.5%) | 19 (82.6%) | 0.125**        |
| How often are you breathless because of your COPD?                       |            |            |                |
| Several times a day                                                      | 21 (87.5%) | 18 (75%)   | 0.672*         |
| Once a day                                                               | 0 (0%)     | 1 (4.2%)   | 3 improvements |
| Couple times a week                                                      | 0 (0%)     | 3 (12.5%)  | 3 worse        |
| Once a week                                                              | 1 (4.2%)   | 2 (8.3%)   | 18 ties        |
| Under once a week                                                        | 2 (8.3%)   | 0 (0%)     |                |
| Does breathlessness stop you performing certain activities?              |            |            |                |
| Yes                                                                      | 19 (79.2%) | 21 (87.5%) | 0.50**         |
| Do you plan activities based on the potential to become short of breath? |            |            |                |
| Yes                                                                      | 20 (83.3%) | 16 (66.7%) | 0.219**        |
| How would you rate VitaBreath for ease of use?                           |            |            |                |
| Excellent                                                                |            | 8 (33.3%)  |                |
| Very Good                                                                |            | 9 (37.5%)  |                |
| Good                                                                     | n/a        | 7 (29.2%)  | n/a            |
| Fair                                                                     |            | 0          |                |
| Poor                                                                     |            | 0          |                |
| How would you rate VitaBreath for portability?                           |            |            |                |
| Excellent                                                                |            | 3 (12.5%)  |                |
| Very Good                                                                | n/a        | 5 (20.8%)  | n/a            |

|                                                                                                                                                                                                   |                                     |                                     |                                                                                   |
|---------------------------------------------------------------------------------------------------------------------------------------------------------------------------------------------------|-------------------------------------|-------------------------------------|-----------------------------------------------------------------------------------|
| Good<br>Fair<br>Poor                                                                                                                                                                              |                                     | 1 (4.2%)<br>7 (29.2%)<br>8 (33.3%)  |                                                                                   |
| How active have you been since VitaBreath, compared to before?§                                                                                                                                   |                                     |                                     |                                                                                   |
| Median (IQR)                                                                                                                                                                                      | 6(5-7)                              | 6(5-7.75)                           | 0.94*                                                                             |
| 1(Much less active) to 4<br>5= The same<br>6 to 10 (much more active)                                                                                                                             | 2 (8.7%)<br>8 (34.8%)<br>13 (56.5%) | 2 (8.4%)<br>8 (33.3%)<br>14 (58.3%) |                                                                                   |
| Given your recent experience with VitaBreath, how likely is it that you would recommend VitaBreath to a friend or colleague, or other people with COPD?§                                          |                                     |                                     |                                                                                   |
| 1 (Not at all likely) to 10 (Extremely likely)                                                                                                                                                    | Median 9 (7-10)                     | Median 10(7-10)                     | 0.404*<br><br>7 less likely to recommend<br>5 more likely to recommend<br>10 Ties |
| Data presented as Median (IQR); Absolute number (%); *Wilcoxon Signed-rank test; ** McNemar's test; § 1 missing record at 2 weeks; ^2 missing records at 2 weeks; ~ 1 record missing at 12 weeks. |                                     |                                     |                                                                                   |
